# Supplementary material for: Improved slit-shaped microseparator and its integration with a microreactor for modular biomanufacturing
Source: Royal Society of Chemistry journal article supplement (doi:10.1039/d1gc00642h), 2021-01-01
Supplement: d1gc00642h1.pdf [file d1gc00642h1.pdf]

## Supporting Information for

### **Improved Slit-shaped Microseparator and its Integration with a Microreactor for Modular Biomanufacturing**

Souryadeep Bhattacharyya,<sup>1,2</sup> Pierre Desir,<sup>1,2</sup> Sebastian Proding<sup>1,2</sup>, Raul F. Lobo<sup>1,2</sup> and  
Dionisios G. Vlachos<sup>1,2\*</sup>

<sup>1</sup>Department of Chemical & Biomolecular Engineering, University of Delaware, 150 Academy  
St., Newark, DE 19716, USA

<sup>2</sup>Catalysis Center for Energy Innovation, RAPID Manufacturing Institute, and Delaware Energy  
Institute (DEI), University of Delaware, 221 Academy St., Newark, DE 19716, USA

\* Corresponding author: [vlachos@udel.edu](mailto:vlachos@udel.edu)

The hydraulic pressure drop in **Figure 2B** was estimated using the Hagen–Poiseuille equation:

$$\Delta P_{hyd} = \frac{12\mu FL}{WH^3} \quad (\text{S1})$$

where  $\mu$  is the dynamic viscosity (Pa-s),  $F$  is the flow rate ( $\text{m}^3/\text{s}$ ),  $L$ ,  $W$  and  $H$  are the length, width and height of the slit (m) respectively.

The capillary pressure in **Figure 2B** was estimated using the Young–Laplace equation:

$$\Delta P_{cap} = \gamma \left( \frac{2}{H} + \frac{2}{W} \right) \quad (\text{S2})$$

where  $\gamma$  is the interfacial tension (N/m)

The slit height is a design variable and a 1.5 mm slit height was used in this work. The slit length and width were 5 and 10 mm, respectively.

## Supporting Figures

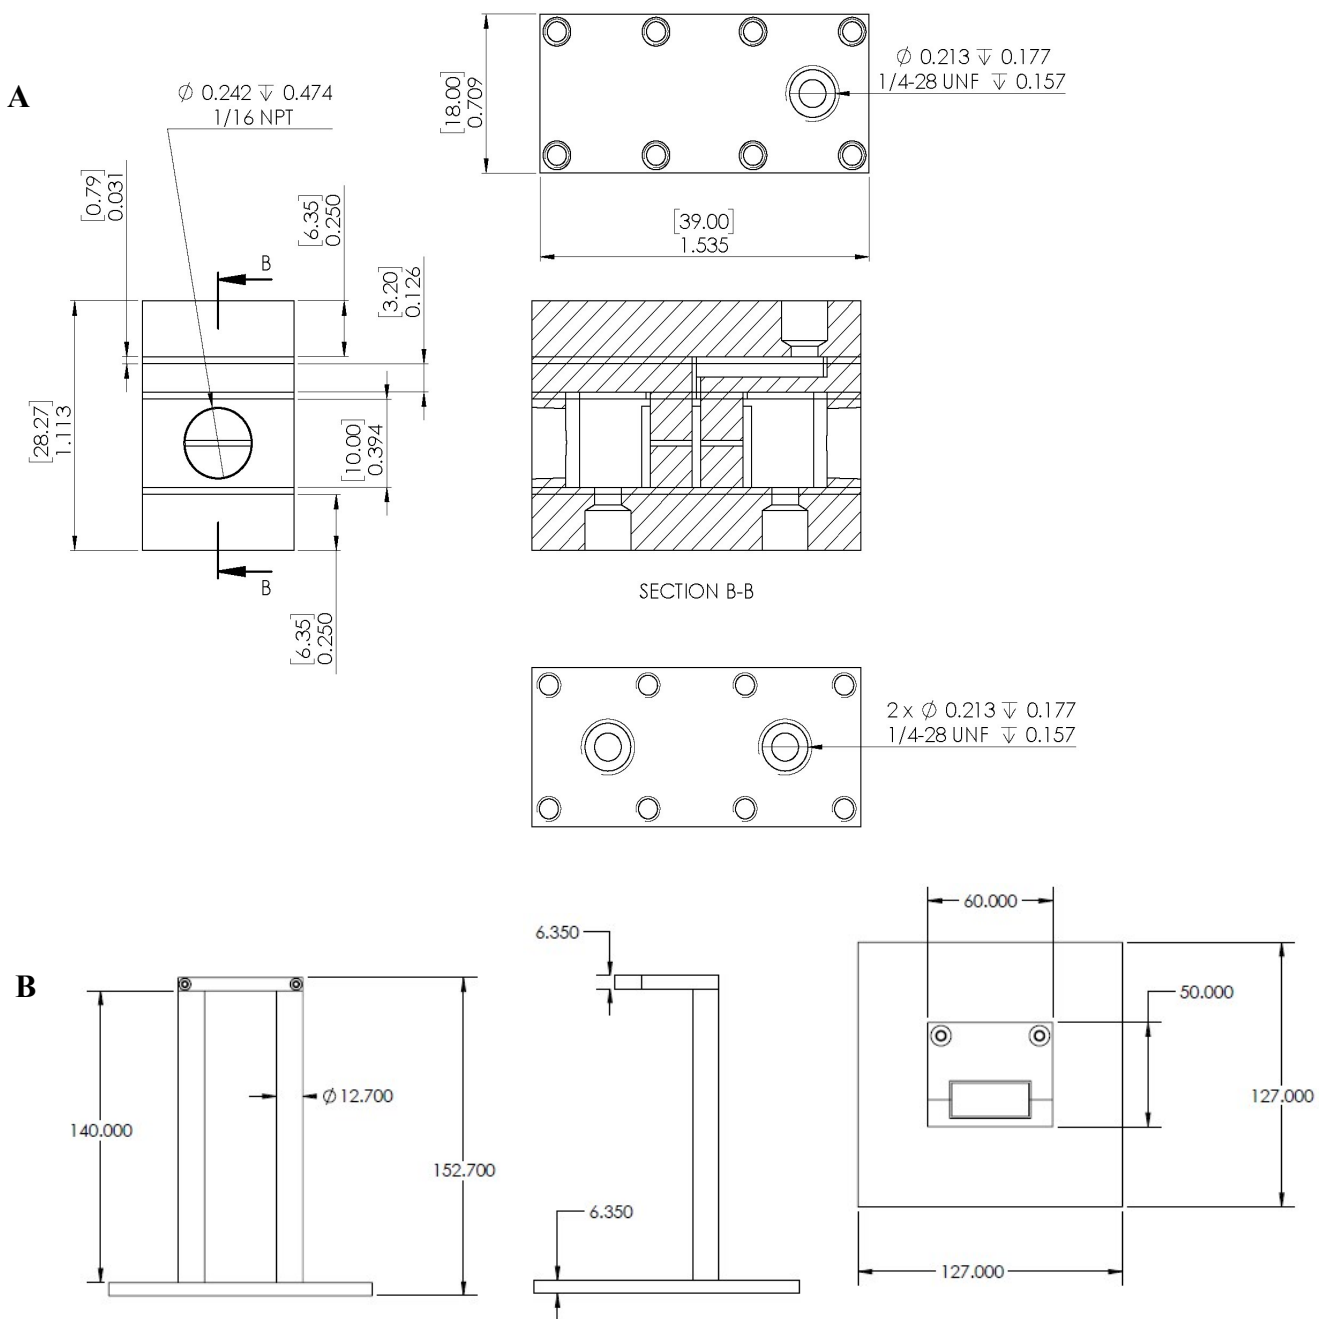

**Figure S1.** Design dimensions of **A)** the slit-separator with its different components and **B)** holding rig for the microseparator.

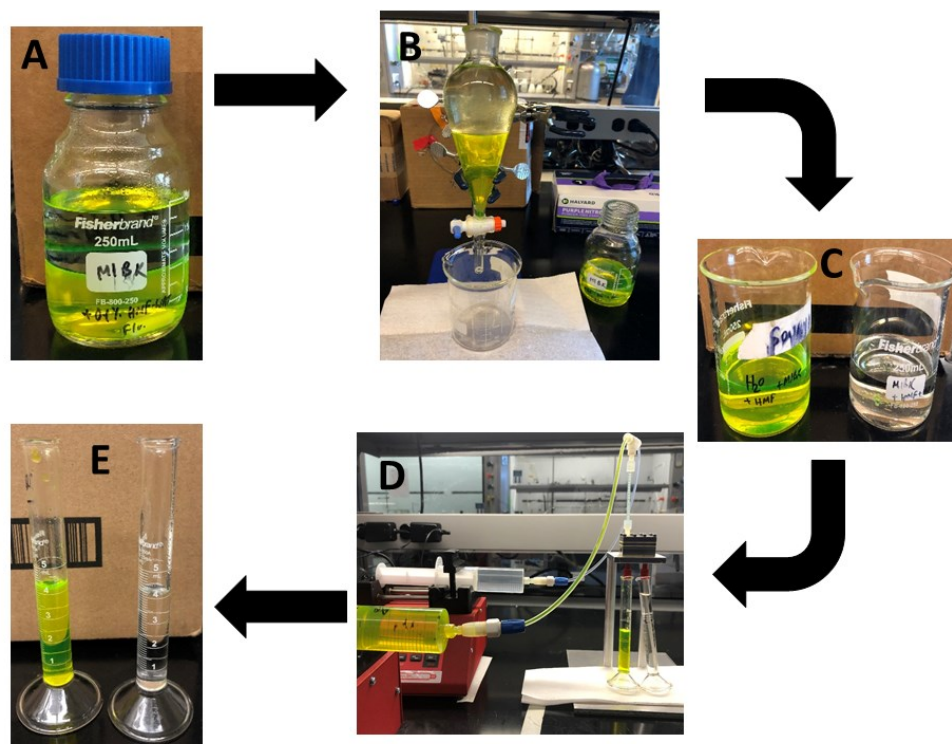

**Figure S2.** Experimental scheme for evaluation of microseparator performance in biphasic systems: A) pre-equilibration, B, C) phase separation using a separatory funnel, D) pumping of the two pre-equilibrated phases into the microseparator with syringe pumps via a tee-junction outlet, and E) liquid samples collected at the separator outlet for visual inspection and quantification using HPLC and KF titration. The initial aqueous phase contains 0.1 wt. % HMF and 0.3 g/L fluorescein (for visualization).

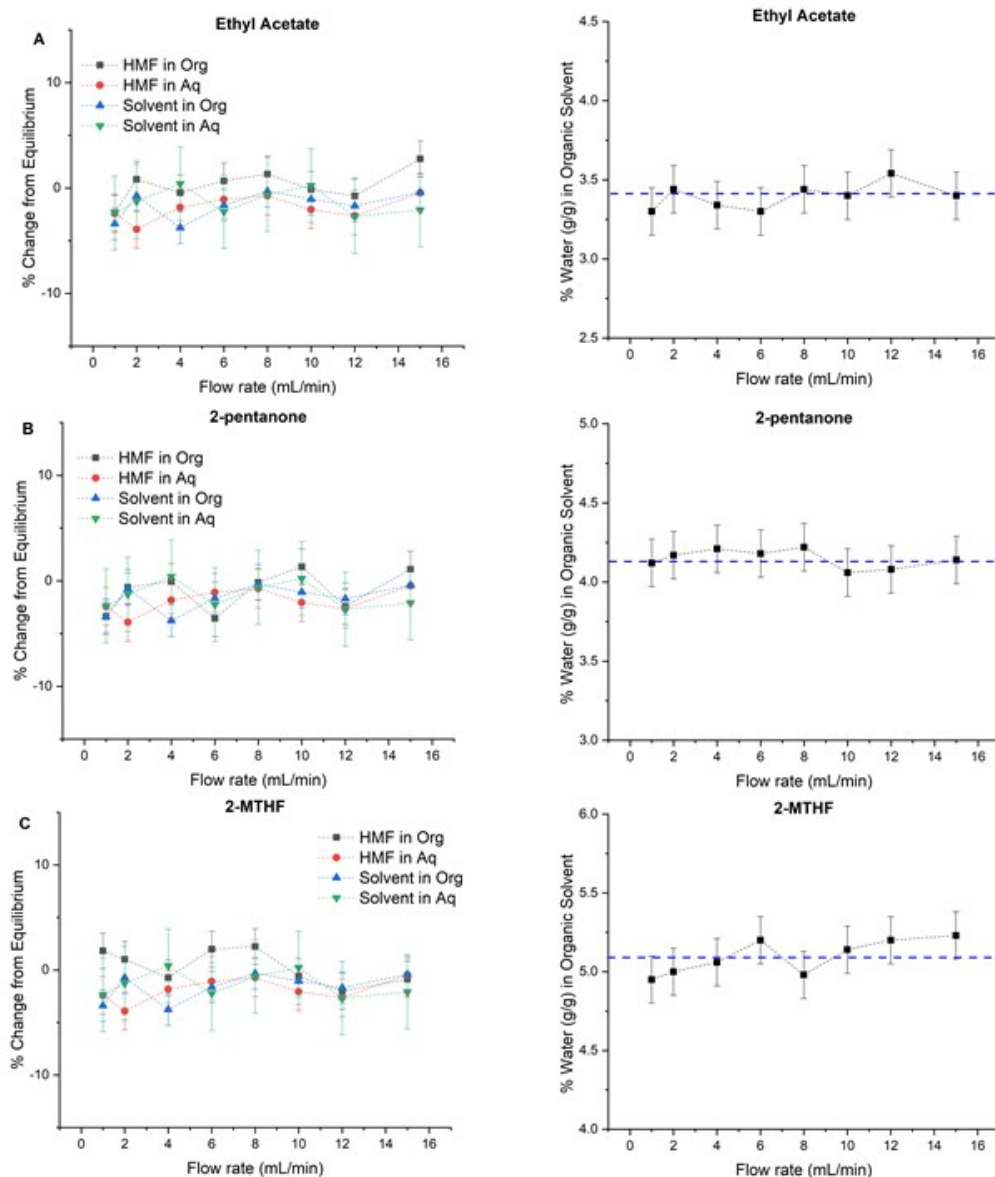

**Figure S3.** HPLC quantification of HMF and solvent concentration deviation at the microseparator outlets from the pre-equilibrated inlet phases for A) ethyl acetate, B) 2-pentanone, and C) 2-MTHF with the corresponding organic phase water content (KF) across a 1-15 mL/min flowrate range with 1:1 flow ratio. Dotted blue lines indicate equilibrium water content in the organic phase. Errors bars indicate total sampling and instrumental error.

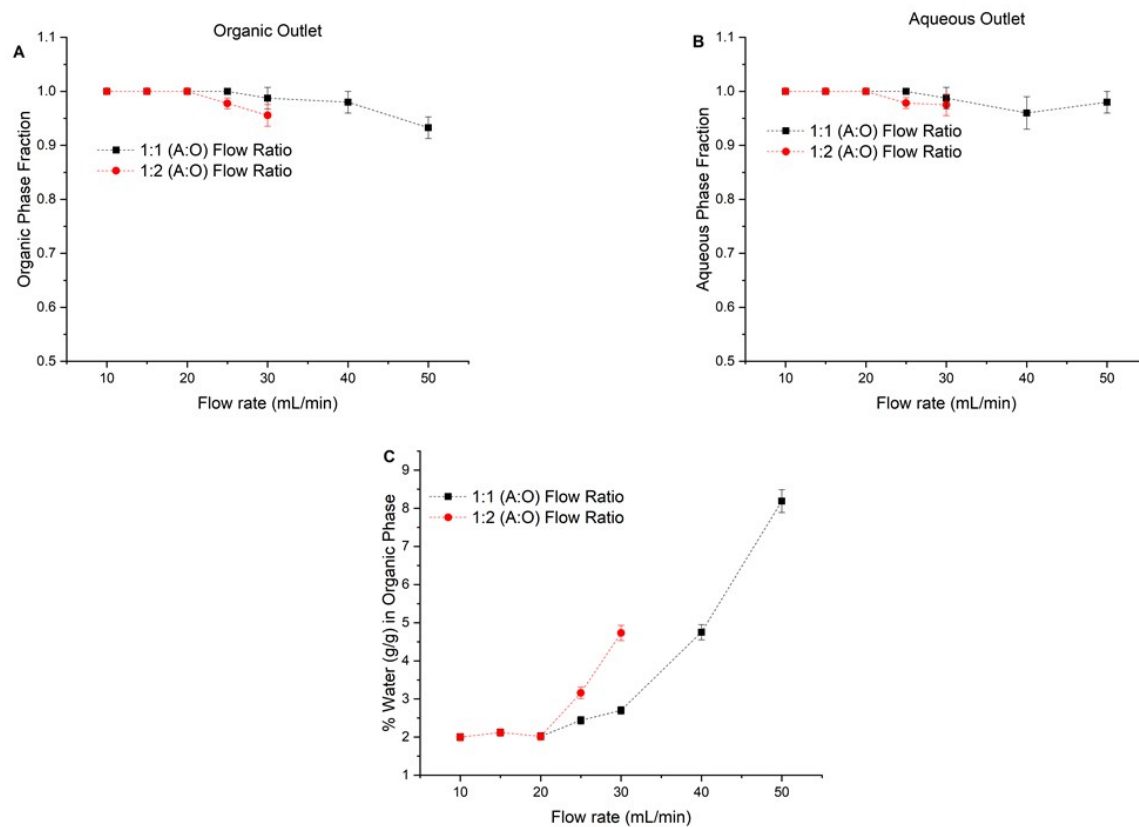

**Figure S4.** Microseparator performance at **A)** organic outlet, **B)** aqueous outlet, and **C)** corresponding organic phase water content (KF) with an increasing flow rate of the MIBK/water biphasic system at 1:1 and 1:2 A:O phase flow ratios.

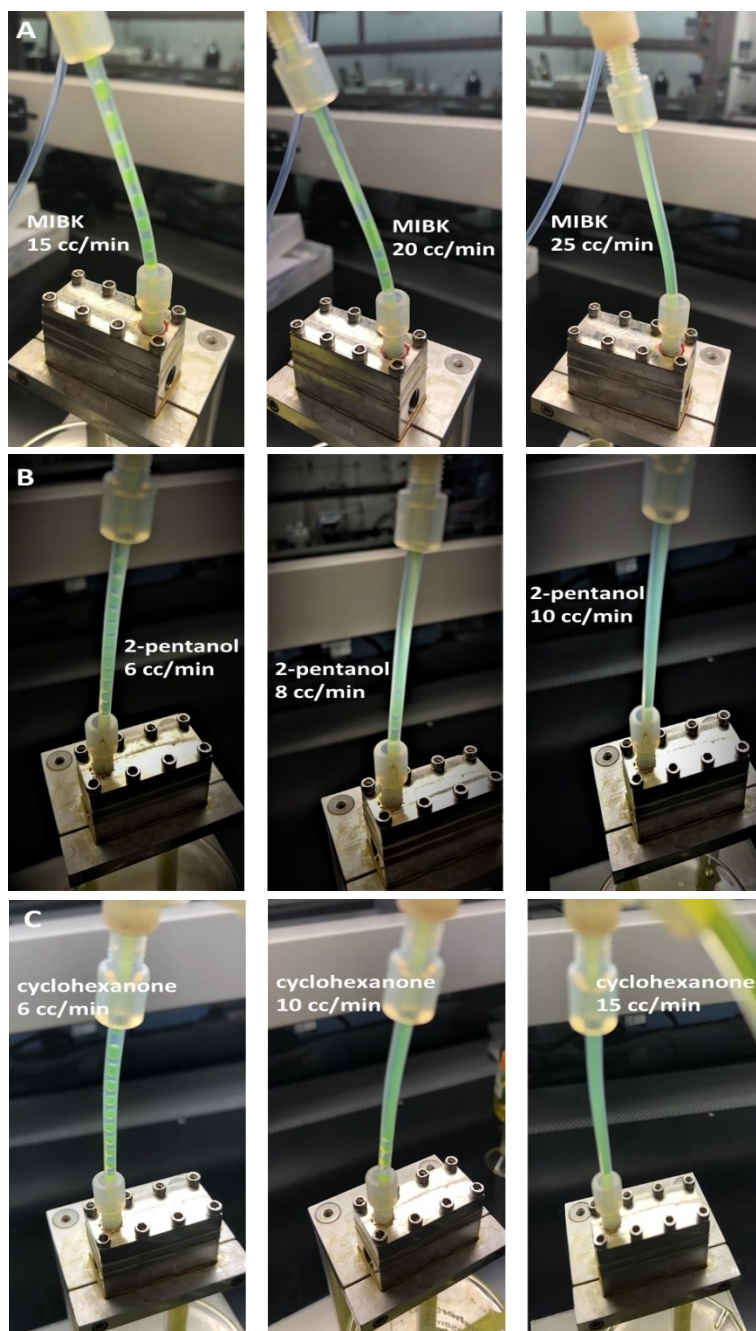

**Figure S5.** Transitions from segmented (L), transitional (M) to non-segmented (R) flow for **A)** MIBK, **B)** 2-pentanol, and **C)** cyclohexanone at the microseparator inlet with increasing flow rates.

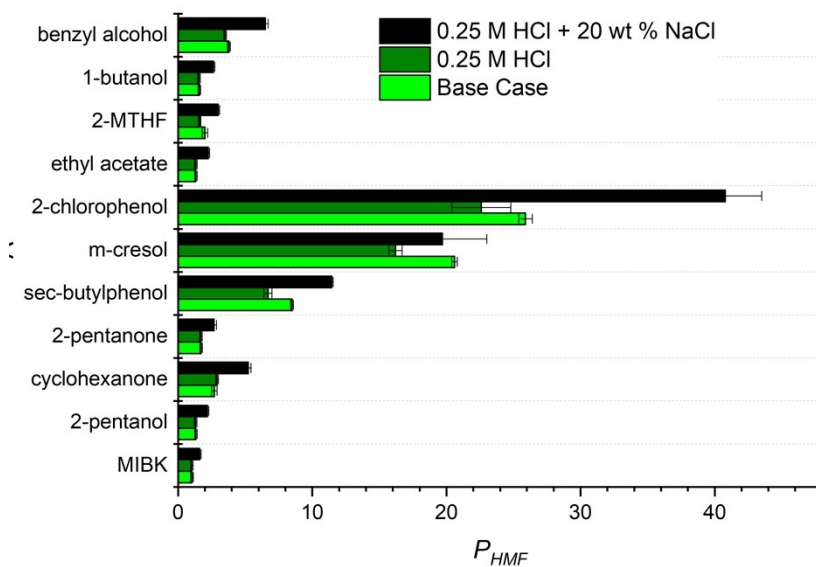

**Figure S6.** Effect of acid (0.25 M HCl) and salt (0.25 M HCl & 20 wt.% NaCl) addition on  $P_{HMF}$  in 11 solvent systems.

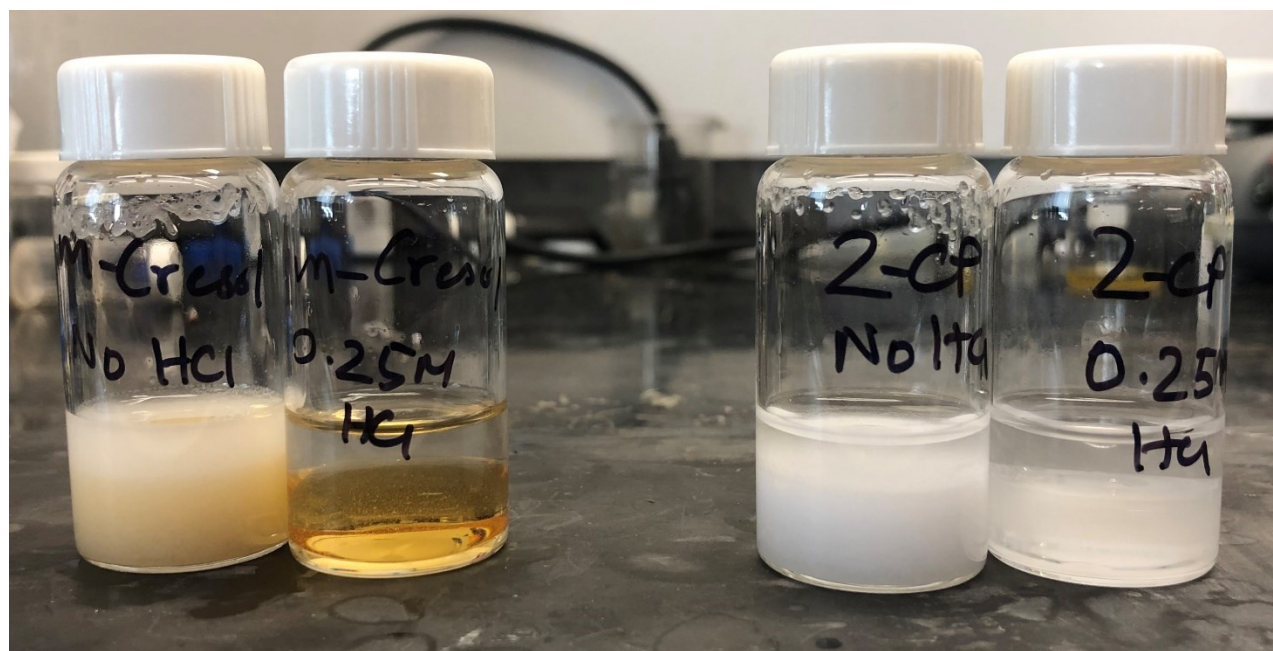

**Figure S7.** Effect of 0.25 M HCl addition on emulsion forming systems of m-cresol (left) and 2-chlorophenol (right).

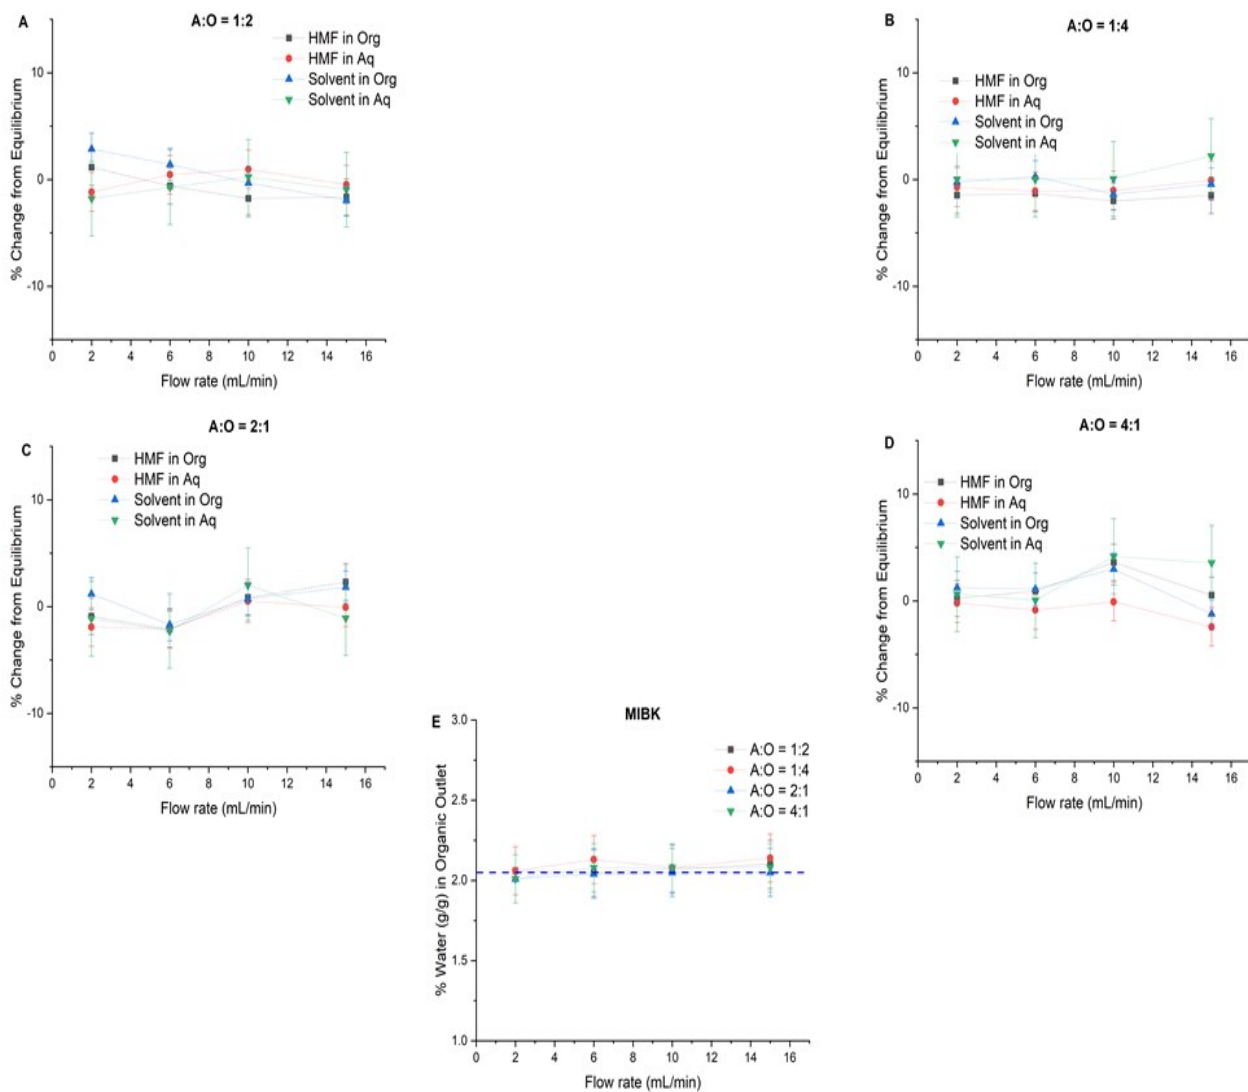

**Figure S8.** HPLC quantification of HMF and solvent concentration deviation at the microseparator outlets from the pre-equilibrated inlet phases for MIBK with **E)** the corresponding organic phase water content (KF) across a 1-15 mL/min flowrate range with aqueous to organic flow ratios of **A)** 1:2, **B)** 1:4, **C)** 2:1, and **D)** 4:1. The dotted blue line (**E)**) indicates equilibrium water content in the organic phase. Error bars indicate total sampling and instrumental error.

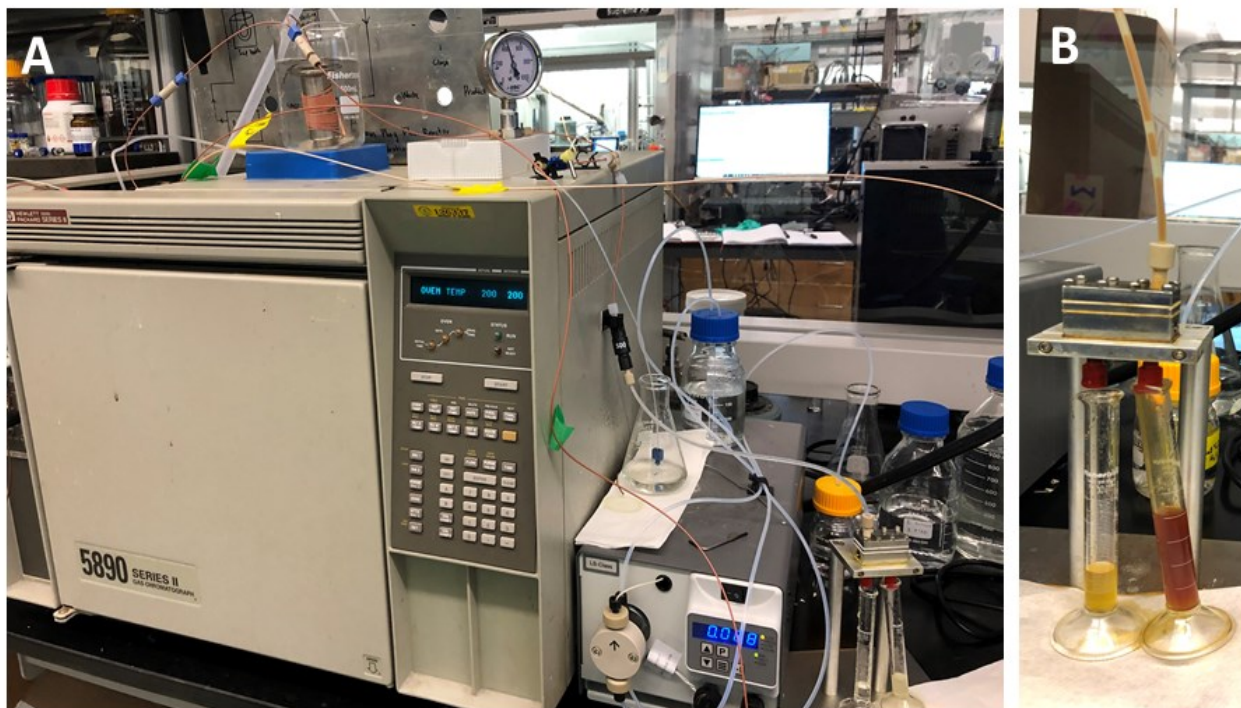

**Figure S9.** The integrated microreactor-microseparator setup (A) and a close up of the microseparator (B) showing perfect phase separation at 5 wt% fructose concentration and O:A=2. Segmented flow patterns in the inlet tubing to the microseparator are observed.

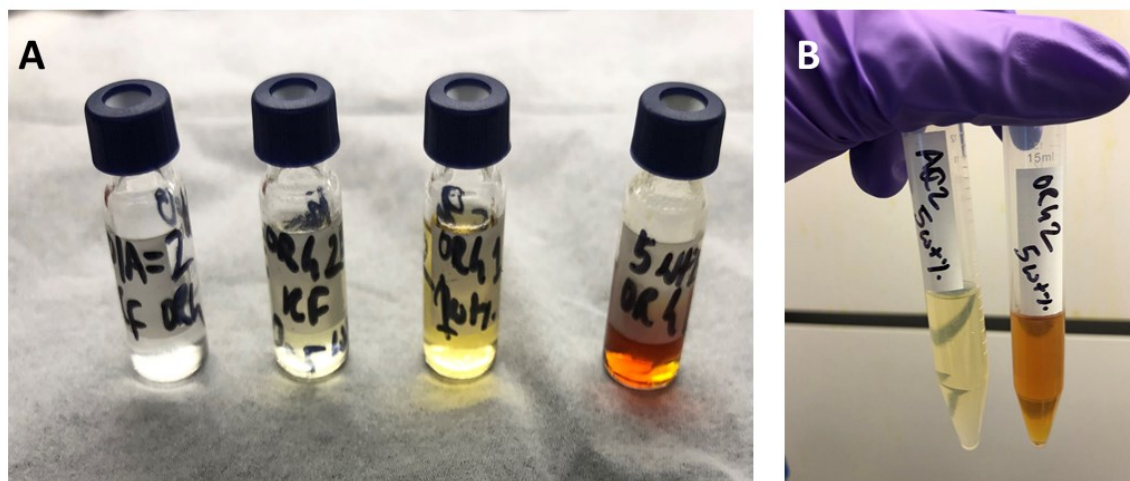

**Figure S10.** Organic phase collected at microseparator outlet showing color change (A) with increased initial fructose concentrations at 0.1 wt.%, 0.5 wt %, 1 wt.%, and 5 wt.% (left to right). Aqueous and organic outlet streams from the microseparator collected at 5 wt% fructose concentration (B).

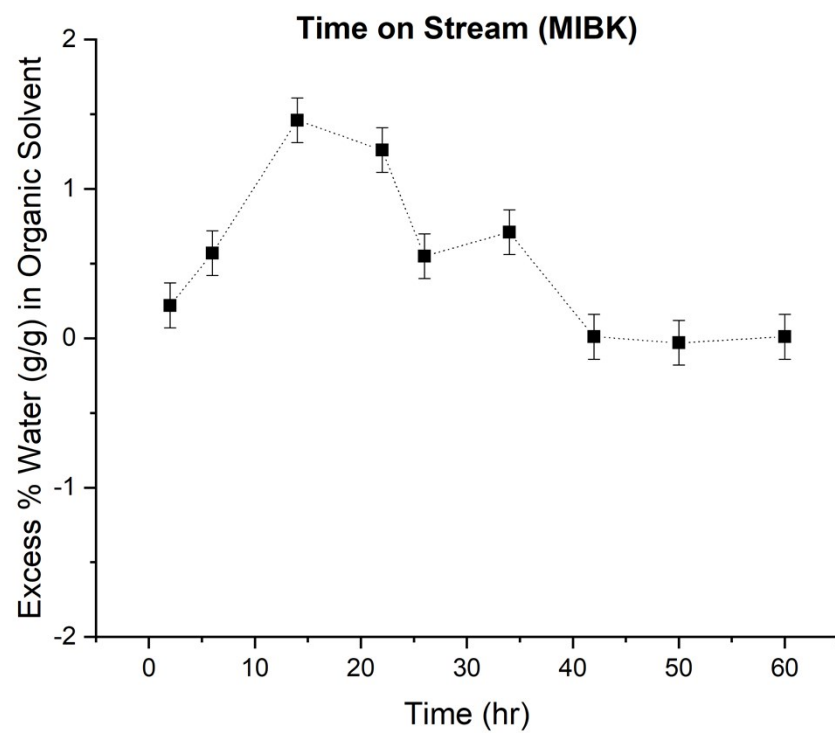

**Figure S11.** Time on stream experiments for the MIBK-water biphasic system at 1:1 flow ratio showing excess organic phase water content (KF) above equilibrium at the microseparator outlet for a continuous flow of 0.2 mL/min.

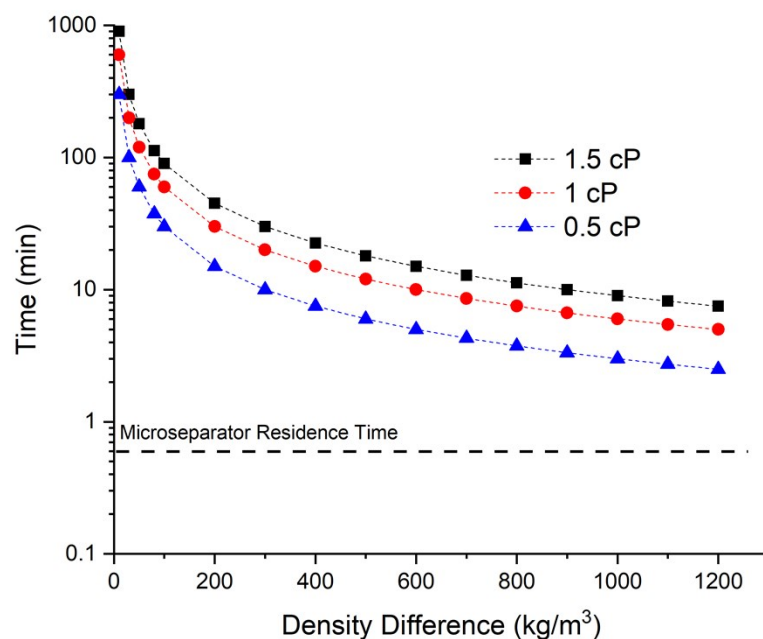

**Figure S12.** Estimated separation time for a gravity decanter with varying viscosity and phase density difference. The microseparator residence time here corresponds to a flow rate of 1 mL/min.

## Supporting Tables

**Table S1.** List of Chemicals, Vendor, Product ID, and Purity.

| Solvent Name            | Vendor and Purity            |
|-------------------------|------------------------------|
| 1-butanol               | Sigma-Aldrich, 99.5%         |
| 2-chlorophenol          | Sigma-Aldrich, $\geq 99\%$   |
| 2-MTHF                  | Sigma-Aldrich, $> 99\%$      |
| 2-pentanol              | Sigma-Aldrich, 98.0%         |
| 2-pentanone             | Sigma-Aldrich, $\geq 99.5\%$ |
| 2-sec-butylphenol       | Sigma-Aldrich, 98%           |
| 5-hydroxymethylfurfural | Sigma-Aldrich, 99%           |
| acetonitrile            | Fisher Chem. LC/MS Grade     |
| cyclohexanone           | Sigma-Aldrich, $\geq 99.0\%$ |
| ethyl acetate           | Sigma-Aldrich, 99.8%         |
| m-cresol                | Sigma-Aldrich, 99.0%         |

**Table S2.** Thermophysical Properties of 11 solvent systems investigated and heptane. Interfacial tension between the aqueous-rich and organic-rich phase of three systems (N/A) could not be measured.

| Name              | Viscosity (cP) | Interfacial Tension (mN/m) |
|-------------------|----------------|----------------------------|
| Water             | 1.01           |                            |
| MIBK              | 0.62           | 10.2                       |
| ethyl acetate     | 0.51           | 6.4                        |
| 2-pentanol        | 3.6            | 3.5                        |
| heptane           | 0.387          | 50.71                      |
| benzyl alcohol    | 4.9            | N/A                        |
| 2-pentanone       | 0.56           | 5.55                       |
| 2-MTHF            | 0.61           | 2.98                       |
| cyclohexanone     | 2.2            | 3.67                       |
| m-Cresol          | 6.8            | N/A                        |
| 2-secbutyl phenol | 14.5           | 12.4                       |
| 2-chlorophenol    | 5.5            | N/A                        |
| 1-butanol         | 3.1            | 1.9                        |

**Table S3.** Effect of 20 % NaCl and 0.25 M HCl on  $P_{\text{HMF}}$  and phase miscibility.

|                   | $P_{\text{HMF}}$ | $P_{\text{HMF}}$ (0.25 M HCl + 20 wt % NaCl) | % Water (organic phase) | % Water (organic phase) (0.25 M HCl + 20 wt % NaCl) |
|-------------------|------------------|----------------------------------------------|-------------------------|-----------------------------------------------------|
| MIBK              | 1.04             | 1.61                                         | 2                       | 1.72                                                |
| 2-pentanol        | 1.33             | 2.19                                         | 11.4                    | 7.34                                                |
| cyclohexanone     | 2.7              | 5.23                                         | 6.1                     | 4.4                                                 |
| 2-pentanone       | 1.72             | 2.67                                         | 4.13                    | 2.49                                                |
| 2-secbutyl phenol | 8.5              | 11.45                                        | 4.12                    | 3.29                                                |
| m-cresol          | 20.6             | 19.7                                         | 12.4                    | 7.56                                                |
| 2-chlorophenol    | 25.9             | 40.8                                         | 11.4                    | 5.9                                                 |
| ethyl acetate     | 1.33             | 2.25                                         | 3.35                    | N/A                                                 |
| 2-MTHF            | 2                | 2.98                                         | 4.95                    | 2.86                                                |
| 1-butanol         | 1.58             | 2.63                                         | 19.7                    | 11.16                                               |
| benzyl alcohol    | 3.78             | 6.5                                          | 10.33                   | 5.78                                                |

**Table S4.** Experimental estimation of the microseparator dead volume.

| <b>Flowrate<br/>(mL/min)</b> | <b>Residence Time (sec)</b> | <b>Dead Volume (mL)</b> |
|------------------------------|-----------------------------|-------------------------|
| 0.5                          | 75                          | 0.625                   |
| 1                            | 36                          | 0.6                     |
